# Supplementary material for: Mrg15 stimulates Ash1 H3K36 methyltransferase activity and facilitates Ash1 Trithorax group protein function in Drosophila
Source: PubMed Central journal article supplement (PMC5696344; doi:10.1038/s41467-017-01897-3), 2017-11-21
Supplement: 41467_2017_1897_MOESM3_ESM.pdf [file 41467_2017_1897_MOESM3_ESM.pdf]

## **Description of Additional Supplementary Files**

File Name: Supplementary Data 1

Description: List of all Ash1 target genes and their expression levels in wild-type, Ash1 knockdown and Mrg15 knockdown S2 cells.
